# Supplementary material for: Cosmetic Application of Cyanobacteria Extracts with a Sustainable Vision to Skincare: Role in the Antioxidant and Antiaging Process
Source: MDPI journal article supplement (doi:10.3390/md20120761), 2022-12-02

**Figure S1:** Keratinocyte (HaCat) viability after 24 and 48 h of incubation with cyanobacteria aqueous (a-g) and acetone (h-n) extracts. (a, h) *Cyanobium* sp. LEGE 07175, (b, i) Synechococcales cyanobacterium LEGE 181150, (c, j) *Leptothoe* sp. LEGE 181156, (d, k) Synechococcales cyanobacterium LEGE 181157, (e, l) Synechococcales cyanobacterium LEGE 181158, (f, m) Oscillatoriales cyanobacterium LEGE 181159 and (g, n) *Leptothoe* sp. LEGE 181155. Results are expressed as % of MTT reduction *vs.* the untreated control. DMSO (20%) represents the positive control. Results are expressed as mean  $\pm$  SD of at least three independent assays, performed in quadruplicate. Statistical differences at \* $p$ <0.05, \*\* $p$ <0.01, \*\*\* $p$ <0.001, \*\*\*\* $p$ <0.0001 (One way ANOVA, Tuckey HSD multiple comparisons test).

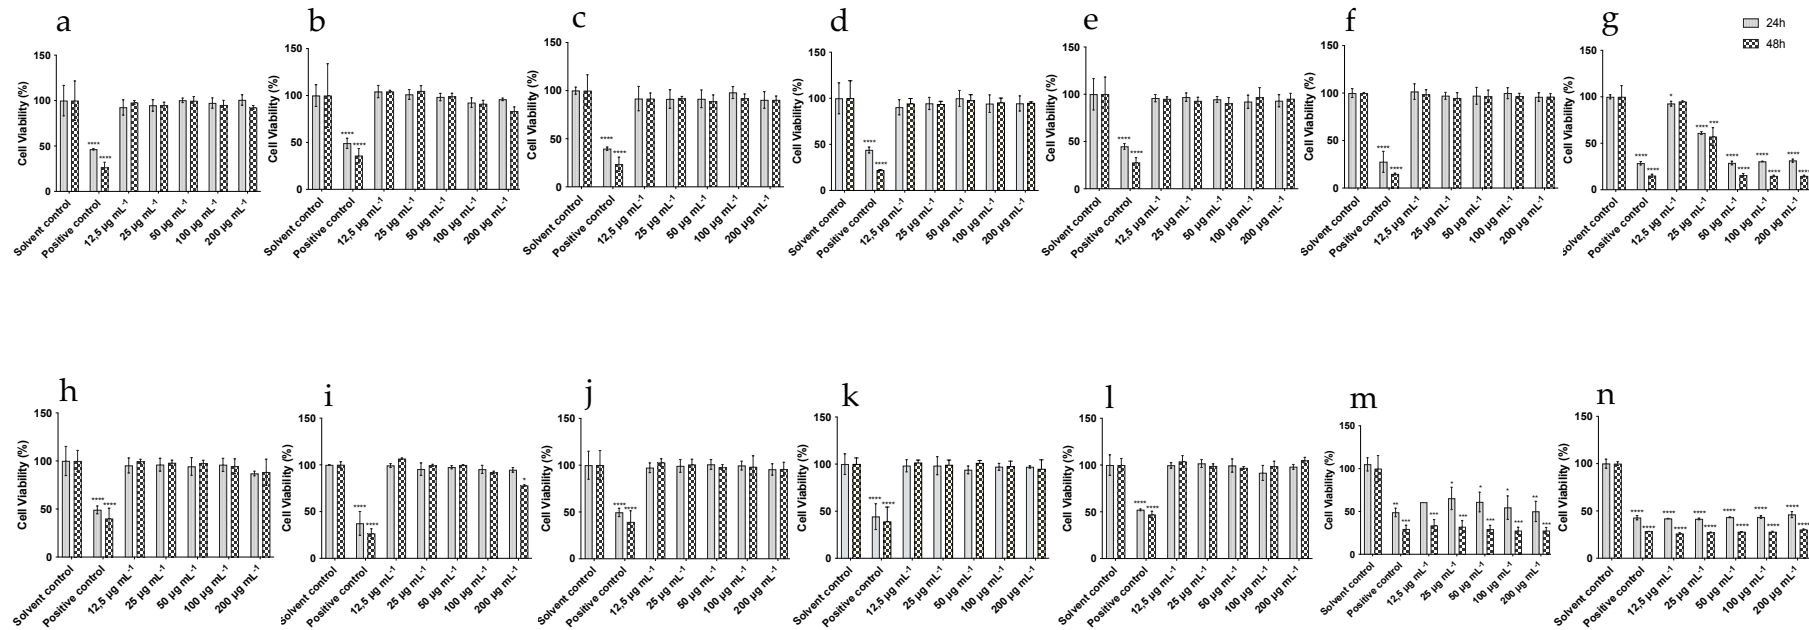

**Figure S2:** Fibroblast (3T3L1) viability after 24 and 48 h of incubation with cyanobacteria aqueous (a-g) and acetone (h-n) extracts. (a, h) *Cyanobium* sp. LEGE 07175, (b, i) Synechococcales cyanobacterium LEGE 181150, (c, j) *Leptothoe* sp. LEGE 181156, (d, k) Synechococcales cyanobacterium LEGE 181157, (e, l) Synechococcales cyanobacterium LEGE 181158, (f, m) Oscillatoriales cyanobacterium LEGE 181159 and (g, n) *Leptothoe* sp. LEGE 181155. Results are expressed as % of MTT reduction vs. the untreated control. DMSO (20%) represents the positive control. Results are expressed as mean  $\pm$  SD of at least three independent assays, performed in quadruplicate. Statistical differences at \* $p < 0.05$ , \*\* $p < 0.01$ , \*\*\* $p < 0.001$ , \*\*\*\* $p < 0.0001$  (One way ANOVA, Tuckey HSD multiple comparisons test).

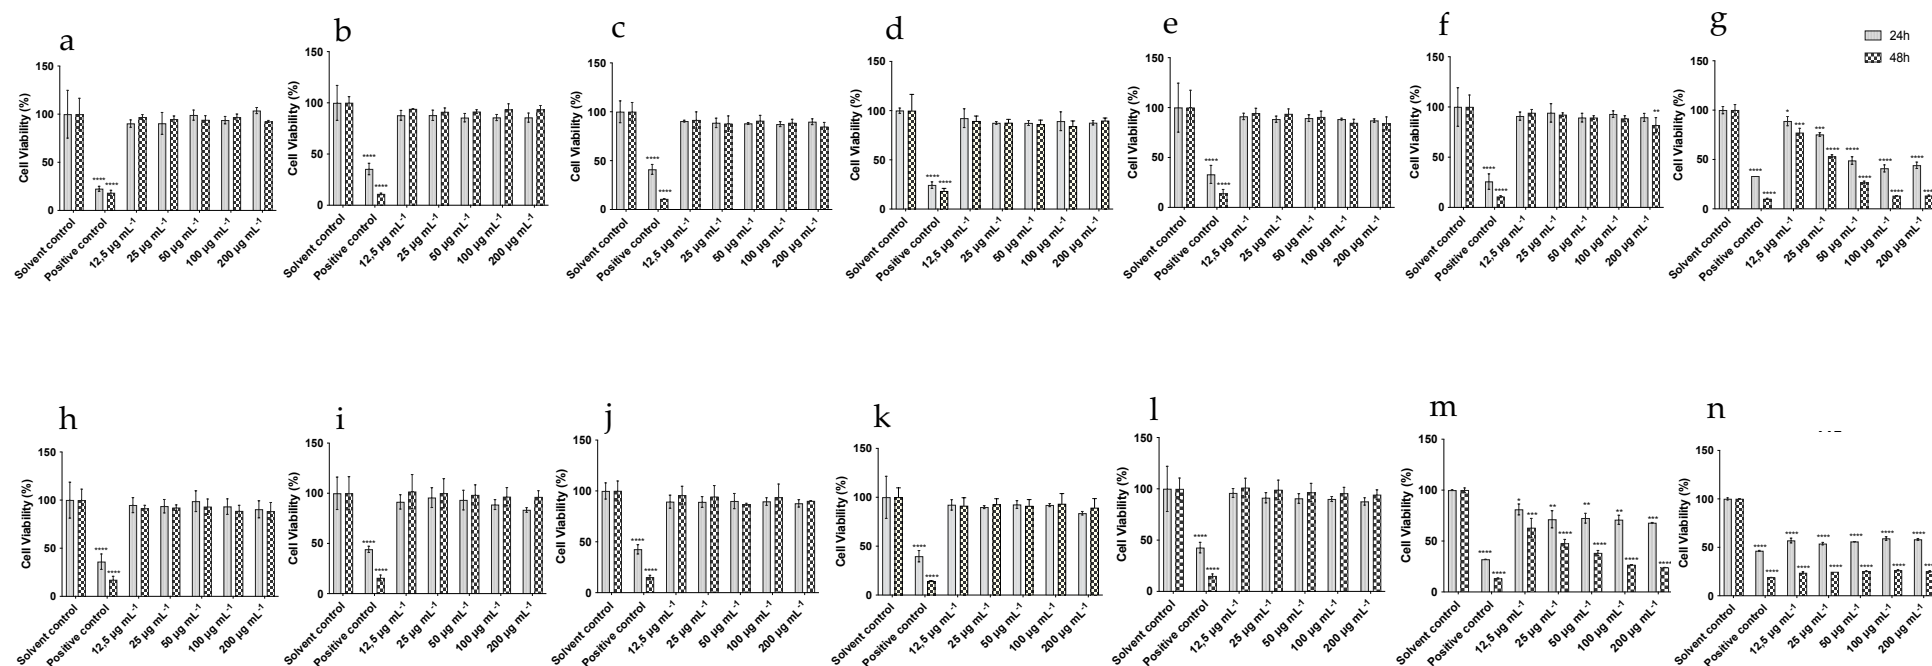

**Figure S3:** Endothelial cell (hCMEC/d3) viability after 24 and 48 h of incubation with cyanobacteria aqueous (a-g) and acetone (h-n) extracts. (a, h) *Cyanobium* sp. LEGE 07175, (b, i) Synechococcales cyanobacterium LEGE 181150, (c, j) *Leptothoe* sp. LEGE 181156, (d, k) Synechococcales cyanobacterium LEGE 181157, (e, l) Synechococcales cyanobacterium LEGE 181158, (f, m) Oscillatoriales cyanobacterium LEGE 181159 and (g, n) *Leptothoe* sp. LEGE 181155. Results are expressed as % of MTT reduction vs. the untreated control. DMSO (20%) represents the positive control. Results are expressed as mean  $\pm$  SD of at least three independent assays, performed in quadruplicate. Statistical differences at \* $p < 0.05$ , \*\* $p < 0.01$ , \*\*\* $p < 0.001$ , \*\*\*\* $p < 0.0001$  (One way ANOVA, Tuckey HSD multiple comparisons test).

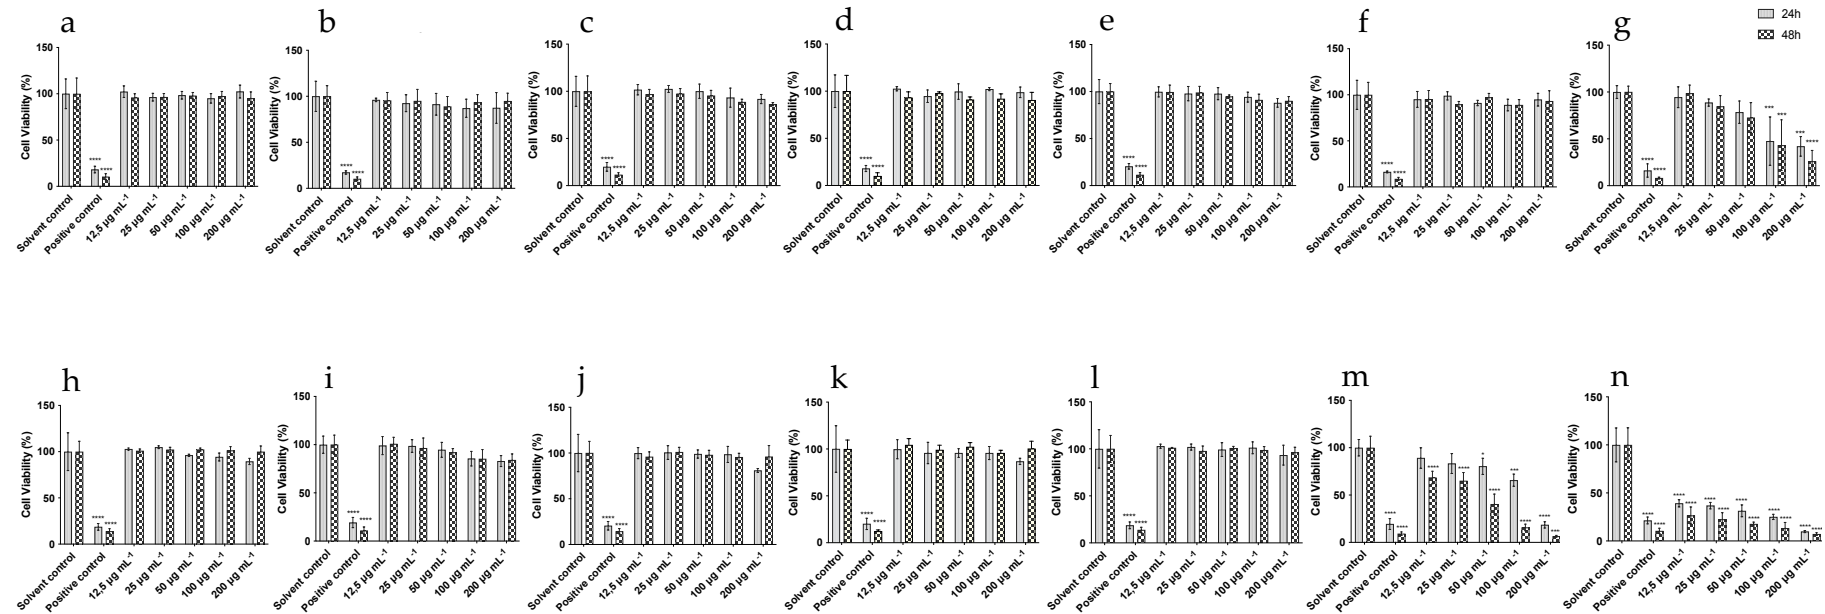

Supplement: s1 [file s1]
